# Supplementary material
Source: ML conference proceedings conference paper supplement (https://aclanthology.org/2020.findings-emnlp.400)
Supplement: OptionalSupplementaryMaterial [file 2020.findings-emnlp.400.OptionalSupplementaryMaterial.pdf]

## A Appendices

### A.1 Data Statistics

As shown in Table 5, there are 30 (*domain, slot*) pairs on MultiWOZ (Budzianowski et al., 2018) dataset, including 10 slots in the *hotel* domain, 6 slots in the *train* domain, 3 slots in the *attraction* domain, 7 slots in the *restaurant* domain, and 4 slots in the *taxi* domain. *hotel* and *restaurant* domains, in particular, have the most dialogues in the dataset. *Taxi* domain, on the other hand, is the one with less data.

|       | Hotel                                                                | Train                                                    | Attraction       | Restaurant                                 | Taxi                                        |
|-------|----------------------------------------------------------------------|----------------------------------------------------------|------------------|--------------------------------------------|---------------------------------------------|
| Slots | price, type, parking, stay, day, people, area, stars, internet, name | destination, departure, day, arrive by, leave at, people | area, name, type | food, price, area, name, time, day, people | destination, departure, arrive by, leave at |
| Train | 3381                                                                 | 3103                                                     | 2717             | 3813                                       | 1654                                        |
| Dev   | 416                                                                  | 484                                                      | 401              | 438                                        | 207                                         |
| Test  | 394                                                                  | 494                                                      | 395              | 437                                        | 195                                         |

Table 5: In total, there are 30 (*domain, slot*) pairs from the selected five domains on MultiWOZ. The numbers in the last three rows indicate the number of dialogues.

|                 | Dialogue History                                                                                                                                                                                                                                                                           |
|-----------------|--------------------------------------------------------------------------------------------------------------------------------------------------------------------------------------------------------------------------------------------------------------------------------------------|
| 100% Data       | <p><b>hi</b> i need to take a train from cambridge , i need to arrive at my destination by 17:00 and ; okay , what day did you have in mind ? ; i would like to leave on saturday . ; what station would you like to arrive at ? ; i need to get to norwich please . ;</p>                 |
| 1% Data w/o SSL | <p>; hi <b>hi</b> need to take a train from cambridge , i need to arrive at my destination by 17:00 and ; okay , what day did you have in mind ? ; i would like to leave on saturday . ; what station would you like to arrive at ? ; i need to get to norwich please . ;</p>              |
| 1% Data w/ SSL  | <p><b>hi</b> ; i need to take a train from cambridge , i need to arrive at my destination by 17:00 and ; okay , what day did you have in mind ? ; i would like to leave on saturday . ; <b>what</b> station would <b>you</b> like to arrive at ? ; i need to get to norwich please . ;</p> |

Figure 6: Attention Visualization

|                 | Dialogue History                                                                                                                                                                                                                                                                                                                                                                                                                                                                                                                                                                                                                                                                                                                                                                                                                                                                                                                                                                                                                                                                                                                                                                                                                                                                                                                                                                                                                                                                                                                                                                        |
|-----------------|-----------------------------------------------------------------------------------------------------------------------------------------------------------------------------------------------------------------------------------------------------------------------------------------------------------------------------------------------------------------------------------------------------------------------------------------------------------------------------------------------------------------------------------------------------------------------------------------------------------------------------------------------------------------------------------------------------------------------------------------------------------------------------------------------------------------------------------------------------------------------------------------------------------------------------------------------------------------------------------------------------------------------------------------------------------------------------------------------------------------------------------------------------------------------------------------------------------------------------------------------------------------------------------------------------------------------------------------------------------------------------------------------------------------------------------------------------------------------------------------------------------------------------------------------------------------------------------------|
| 100% Data       | <p><b>hi</b> ; hello , i would like to find a hotel that include -s free parking . ; most of the hotel -s in town offer free parking . is there a certain area you would like to stay in , or do you have a price range in mind ? ; yes . the centre would be nice and also free wifi . ; the university arms is an expensive , 4 star hotel with free wifi . comparatively , the alexander bed and breakfast is a cheap -ly priced guesthouse , also 4 stars . ; please book me some rooms for the university arms to accommodate 8 people for 3 nights starting on wednesday . can you also provide me the reference number after you book ? ; your reference number is x5ny66zv . ; thank you . can you please help me find a place to go in town in the same area as the hotel ? preferably a college . ; there are no colleges close to the area you are requesting , would you like to chose another destination ? ; i believe there are some colleges in the centre of town . can you please check again ? ; i am sorry but i rechecked and there are no colleges in that area . is there anything else that i can do for you ? ; hmmm , i was looking for the phone number and postcode of a college in the centre area . could you help me with that ? ; i have 5 colleges in the centre area . what specific college are you looking for ? ; i am looking for cambridge . ; i am sorry , there are no listings for cambridge college in the centre area . is there another college you would like me to look for ? ; oh , it could be anyone then . just a college . ;</p>    |
| 1% Data w/o SSL | <p>; hi <b>hi</b> hello , i would like to find a hotel that include -s free parking . ; most of the hotel -s in town offer free parking . is there a certain area you would like to stay in , or do you have a price range in mind ? ; yes . the centre would be nice and also free wifi . ; the university arms is an expensive , 4 star hotel with free wifi . comparatively , the alexander bed and breakfast is a cheap -ly priced guesthouse , also 4 stars . ; please book me some rooms for the university arms to accommodate 8 people for 3 nights starting on wednesday . can you also provide me the reference number after you book ? ; your reference number is x5ny66zv . ; thank you . can you please help me find a place to go in town in the same area as the hotel ? preferably a college . ; there are no colleges close to the area you are requesting , would you like to chose another destination ? ; i believe there are some colleges in the centre of town . can you please check again ? ; i am sorry but i rechecked and there are no colleges in that area . is there anything else that i can do for you ? ; hmmm , i was looking for the phone number and postcode of a college in the centre area . could you help me with that ? ; i have 5 colleges in the centre area . what specific college are you looking for ? ; i am looking for cambridge . ; i am sorry , there are no listings for cambridge college in the centre area . is there another college you would like me to look for ? ; oh , it could be anyone then . just a college . ;</p> |
| 1% Data w/ SSL  | <p><b>hi</b> ; hello , i would like to find a hotel that include -s free parking . ; most of the hotel -s in town offer free parking . is there a certain area you would like to stay in , or do you have a price range in mind ? ; yes . the centre would be nice and also free wifi . ; the university arms is an expensive , 4 star hotel with free wifi . comparatively , the alexander bed and breakfast is a cheap -ly priced guesthouse , also 4 stars . ; please book me some rooms for the university arms to accommodate 8 people for 3 nights starting on wednesday . can you also provide me the reference number after you book ? ; your reference number is x5ny66zv . ; thank you . can you please help me find a place to go in town in the same area as the hotel ? preferably a college . ; there are no colleges close to the area you are requesting , would you like to chose another destination ? ; i believe there are some colleges in the centre of town . can you please check again ? ; i am sorry but i rechecked and there are no colleges in that area . is there anything else that i can do for you ? ; hmmm , i was looking for the phone number and postcode of a college in the centre area . could you help me with that ? ; i have 5 colleges in the centre area . what specific college are you looking for ? ; i am looking for cambridge . ; i am sorry , there are no listings for cambridge college in the centre area . is there another college you would like me to look for ? ; oh , it could be anyone then . just a college . ;</p>    |

Figure 7: Attention Visualization

|                        | 1%                   | 5%                   | 10%                  | 25%                  |
|------------------------|----------------------|----------------------|----------------------|----------------------|
| TRADE (w/o Ont.)       | 10.35 (12.58)        | 27.70 (31.17)        | 32.61 (36.18)        | 38.46 (42.71)        |
| + Consistency          | 13.77 (15.58)        | 27.95 (31.89)        | 33.64 (37.40)        | 40.06 (43.45)        |
| + Behavior             | 18.69 (22.10)        | 29.95 (34.30)        | <b>34.57 (38.43)</b> | 39.42 (42.45)        |
| Consistency + Behavior | <b>19.50 (21.90)</b> | <b>30.59 (35.13)</b> | 34.50 (38.12)        | <b>40.15 (43.40)</b> |

Table 6: Semi-supervised learning joint goal accuracy (and its fuzzy matching version in parentheses) on MultiWOZ-2.1 test set from 1% to 25% training data.

|                 | Dialogue History                                                                                                                                                                                                                                                                                                                                                                                                                                                                                                                                                                                                                                                                                                                                                                                                                                                                                                                                                                                                                                                                                                                                                            |
|-----------------|-----------------------------------------------------------------------------------------------------------------------------------------------------------------------------------------------------------------------------------------------------------------------------------------------------------------------------------------------------------------------------------------------------------------------------------------------------------------------------------------------------------------------------------------------------------------------------------------------------------------------------------------------------------------------------------------------------------------------------------------------------------------------------------------------------------------------------------------------------------------------------------------------------------------------------------------------------------------------------------------------------------------------------------------------------------------------------------------------------------------------------------------------------------------------------|
| 100% Data       | <p><b>hi</b> i need a train leaving king s lynn after 13:45 . ; what day will you be traveling ? ; this will be for <b>wednesday</b> . ; there is tr9057 which is at 9.80 pounds and takes 47 minutes . will you book that ? ; no that will not be necessary . can you just tell me what the arrival time is ? ; no train leaving kings lynn at 13.45 . do you want to change the departure time ? ; i can leave any time after 13:45 going to <b>cambridge</b> . will you check the schedule again , please ? ; sorry , there are actually 10 entries here . shall i book 1 for you ? ; just the first departure after 13:45 please , no booking , just the price and arrival time . ; tr8143 will cost 9.80 pounds and arrives by 14:58 . anything else i can do for you ? ; i also need to find a place to stay . ; what area of town would you like to be in ? ; it doesnt matter . i just want it to be a <b>cheap</b> guesthouse with <b>wifi</b> included . ; i can recommend the <b>allenbell</b> . it s in the east , is cheap yet has a 4 star rating and free wifi and parking . can i help you book ? ; no i just need the phone number . thanks ;</p>          |
| 1% Data w/o SSL | <p><b>hi</b> i need a train leaving king s lynn after 13:45 . ; what day will you be traveling ? ; this will be for <b>wednesday</b> . ; there is tr9057 which is at 9.80 pounds and takes 47 minutes . will you book that ? ; no that will not be necessary . can you just tell me what the arrival time is ? ; no train leaving kings lynn at 13.45 . do you want to change the departure time ? ; i can leave any time after 13:45 going to <b>cambridge</b> . will you check the schedule again , please ? ; sorry , there are actually 10 entries here . shall i book 1 for you ? ; just the first departure after 13:45 please , no booking , just the price and arrival time . ; tr8143 will cost 9.80 pounds and arrives by 14:58 . anything else i can do for you ? ; i also need to find a place to stay . ; what area of town would you like to be in ? ; it doesnt matter . i just want it to be a <b>cheap</b> guesthouse with <b>wifi</b> included . ; i can recommend the <b>allenbell</b> . it s in the east , is cheap yet has a 4 star rating and free wifi and parking . can i help you book ? ; no i just need the phone number . thanks ;</p>          |
| 1% Data w/ SSL  | <p><b>hi</b> ; i need a train leaving king s lynn after 13:45 . ; what day will you be traveling ? ; this will be for <b>wednesday</b> . ; there is tr9057 which is at 9.80 pounds and takes 47 minutes . will you book that ? ; no that will not be necessary . can you just tell me what the arrival time is ? ; no train leaving kings lynn at 13.45 . do you want to change the departure time ? ; i can leave any time after 13:45 going to <b>cambridge</b> . will you check the schedule again , please ? ; sorry , there are actually 10 entries here . shall i book 1 for you ? ; just the first departure after 13:45 please , no booking , just the price and arrival time . ; tr8143 will cost 9.80 pounds and arrives by 14:58 . anything else i can do for you ? ; i also need to find a place to stay . ; what area of town would you like to be in ? ; it doesnt matter . i just want it to be a <b>cheap</b> guesthouse with <b>wifi</b> included . ; i can recommend the <b>allenbell</b> . it s in the east , is cheap yet has a 4 star rating and free wifi and parking . <b>can i help you book ?</b> ; no i just need the phone number . thanks ;</p> |

Figure 8: Attention Visualization

|                 | Dialogue History                                                                                                                                                                                                                                                                                                                                                                                                                                                                                                                                                                                                                                                                                                                                                                                                                                                                                                                                                                                |
|-----------------|-------------------------------------------------------------------------------------------------------------------------------------------------------------------------------------------------------------------------------------------------------------------------------------------------------------------------------------------------------------------------------------------------------------------------------------------------------------------------------------------------------------------------------------------------------------------------------------------------------------------------------------------------------------------------------------------------------------------------------------------------------------------------------------------------------------------------------------------------------------------------------------------------------------------------------------------------------------------------------------------------|
| 100% Data       | <p><b>hi</b> hey i am looking for a train from <b>cambridge</b> to <b>bishops stortford</b> . mind helping out ? ; many trains are leaving on <b>friday</b> . mind choosing the time ? ; i want to leave on <b>monday</b> and arrive by <b>18:45</b> . ; i have train tr4283 that leaves <b>cambridge</b> at 5:29 and arrives in <b>bishops stortford</b> at 6:07 . would you like to make reservations ? ; could you give me the travel time and price of that train please ? ; the cost is 10.10 pounds . the duration of the trip is 38 minutes , leaving <b>cambridge</b> at 5:29 and arriving at 6:07 in <b>bishops stortford</b> . ; i also want a <b>cheap chinese</b> restaurant . ; there are 4 great restaurant -s to choose from . do you prefer 1 on the south side of town or in the centre ? ; i would like to be in the <b>centre</b> please . ; i recommend <b>charlie chan</b> . would you like to reserve a table ? ; yes . <b>monday</b> , 8 people , <b>10:30</b> . ;</p>   |
| 1% Data w/o SSL | <p><b>hi</b> hey i am looking for a train from <b>cambridge</b> to <b>bishops stortford</b> . mind helping out ? ; many trains are leaving on <b>friday</b> . mind choosing the time ? ; i want to leave on <b>monday</b> and arrive by <b>18:45</b> . ; i have train tr4283 that leaves <b>cambridge</b> at 5:29 and arrives in <b>bishops stortford</b> at 6:07 . would you like to make reservations ? ; could you give me the travel time and price of that train please ? ; the cost is 10.10 pounds . the duration of the trip is 38 minutes , leaving <b>cambridge</b> at 5:29 and arriving at 6:07 in <b>bishops stortford</b> . ; i also want a <b>cheap chinese</b> restaurant . ; there are 4 great restaurant -s to choose from . do you prefer 1 on the south side of town or in the centre ? ; i would like to be in the <b>centre</b> please . ; i recommend <b>charlie chan</b> . would you like to reserve a table ? ; yes . <b>monday</b> , 8 people , <b>10:30</b> . ;</p>   |
| 1% Data w/ SSL  | <p><b>hi</b> ; hey i am looking for a train from <b>cambridge</b> to <b>bishops stortford</b> . mind helping out ? ; many trains are leaving on <b>friday</b> . mind choosing the time ? ; i want to leave on <b>monday</b> and arrive by <b>18:45</b> . ; i have train tr4283 that leaves <b>cambridge</b> at 5:29 and arrives in <b>bishops stortford</b> at 6:07 . would you like to make reservations ? ; could you give me the travel time and price of that train please ? ; the cost is 10.10 pounds . the duration of the trip is 38 minutes , leaving <b>cambridge</b> at 5:29 and arriving at 6:07 in <b>bishops stortford</b> . ; i also want a <b>cheap chinese</b> restaurant . ; there are 4 great restaurant -s to choose from . do you prefer 1 on the south side of town or in the centre ? ; i would like to be in the <b>centre</b> please . ; i recommend <b>charlie chan</b> . would you like to reserve a table ? ; yes . <b>monday</b> , 8 people , <b>10:30</b> . ;</p> |

Figure 9: Attention Visualization
